# Supplementary material
Source: PubMed Central journal article supplement (PMC365686)

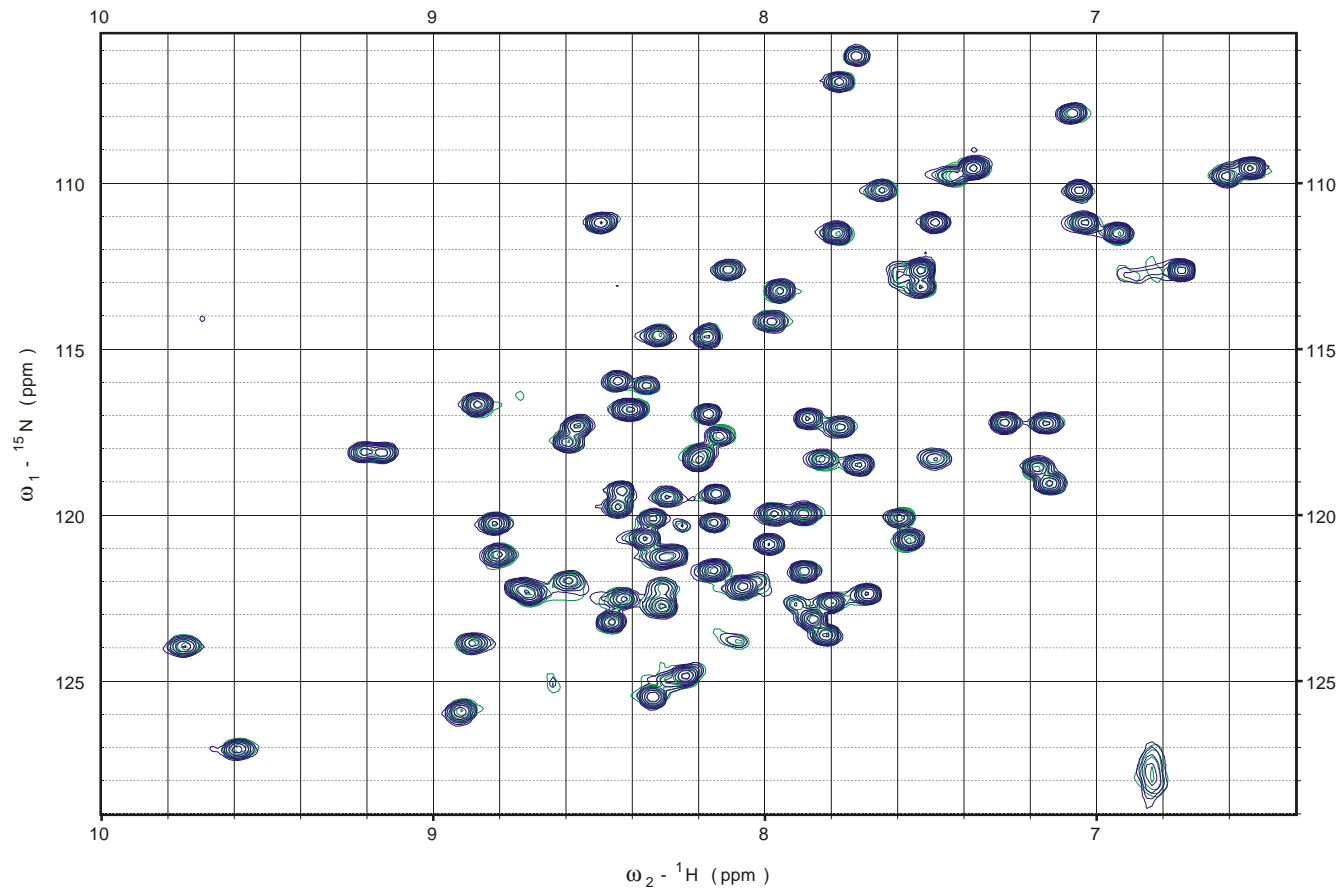

Supplement: pnas_101_9_2712__2.pdf [file pnas_101_9_2712__2.pdf]

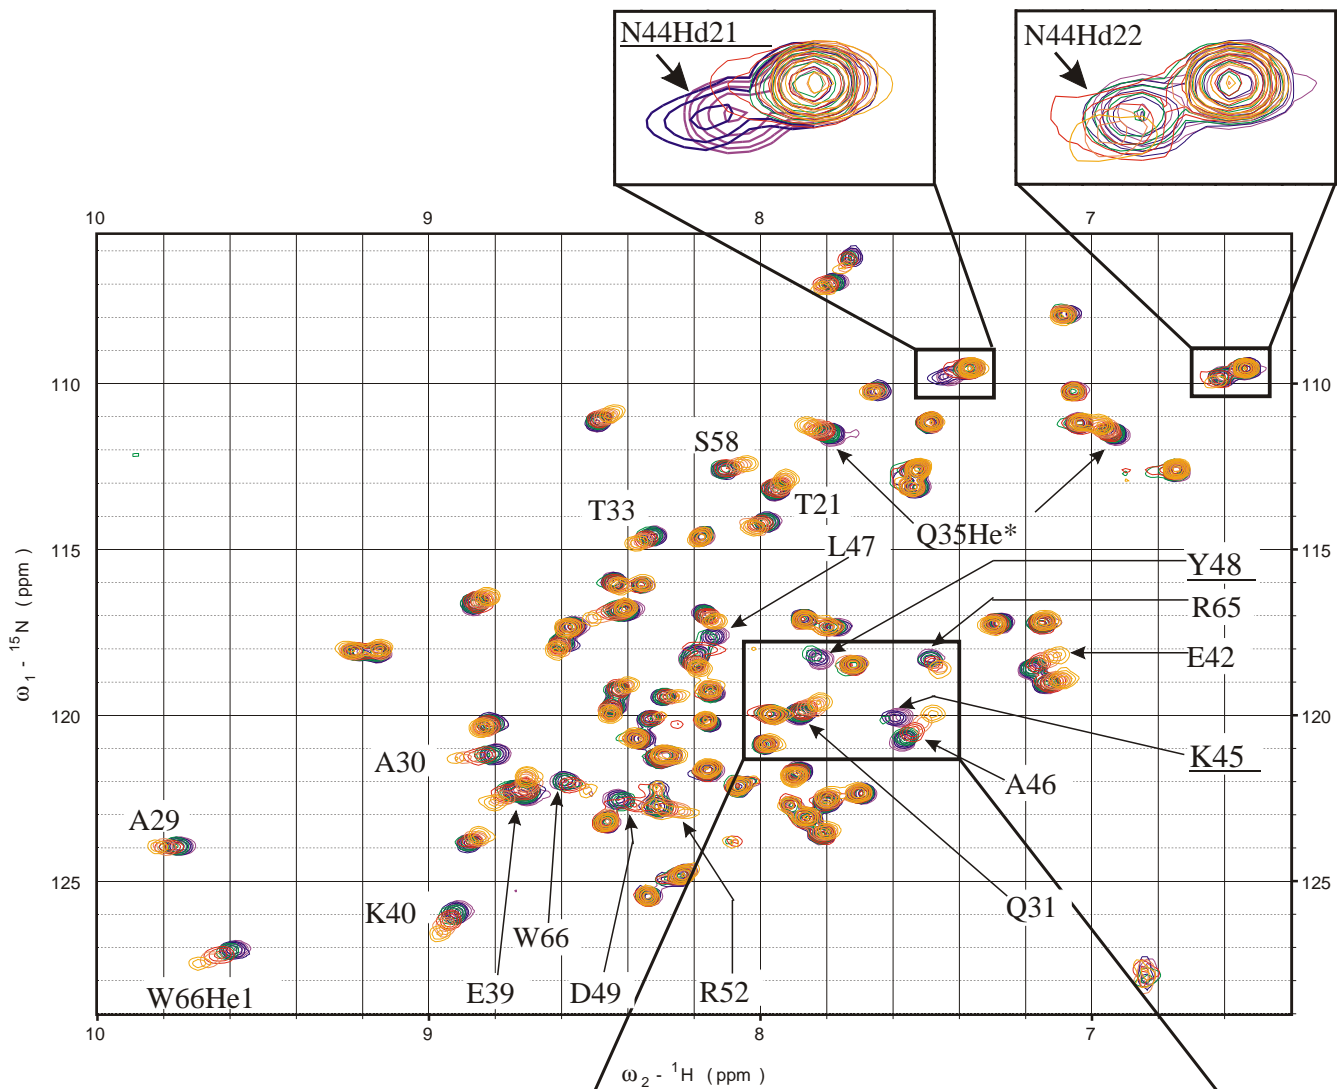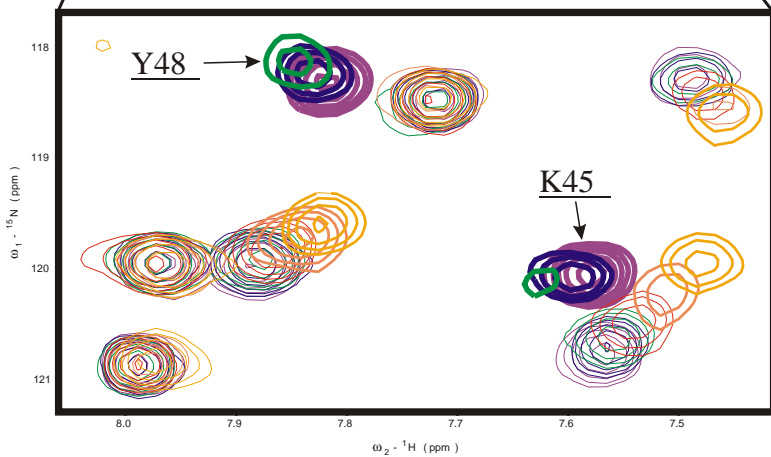

Supplement: pnas_101_9_2712__5.pdf [file pnas_101_9_2712__5.pdf]
